# Supplementary material for: Effects of steroid hormones on differentiated glandular epithelial and stromal cells in a three dimensional cell culture model of the canine endometrium
Source: PubMed Central journal article supplement (PMC3660264; doi:10.1186/1746-6148-9-86), 2013-04-24
Supplement: 1746-6148-9-86-S1.pdf [file 1746-6148-9-86-S1.pdf]

| Cell culture medium / time | Immunohistochemical evaluation / scoring |               |                        |               |                        |             |
|----------------------------|------------------------------------------|---------------|------------------------|---------------|------------------------|-------------|
|                            | Estrogen receptors                       |               | Progesterone receptors |               | Proliferative activity |             |
|                            | GECs                                     | SCs           | GECs                   | SCs           | GECs                   | SCs         |
| standard / 24h             | 96,23 ± 3,05                             | 71,07 ± 11,07 | 61,21 ± 5,00           | 61,37 ± 4,61  | 0,03 ± 0,09            | 0,20 ± 0,16 |
| standard / 48h             | 86,32 ± 7,03                             | 51,41 ± 22,11 | 57,42 ± 6,70           | 52,39 ± 8,07  | 0,04 ± 0,07            | 0,18 ± 0,24 |
| hormone free / 24h         | 69,73 ± 7,12                             | 67,67 ± 11,58 | 64,65 ± 12,72          | 46,71 ± 11,31 | 0,25 ± 0,41            | 0,06 ± 0,08 |
| hormone free / 48h         | 45,92 ± 7,78                             | 25,67 ± 9,56  | 57,71 ± 8,30           | 38,15 ± 13,12 | 0,13 ± 0,24            | 0,16 ± 0,22 |
| E 100 pg/mL / 24h          | 93,99 ± 4,87                             | 64,02 ± 11,19 | 74,93 ± 12,48          | 61,93 ± 7,17  | 0,05 ± 0,09            | 0,00 ± 0,00 |
| E 30 pg/mL / 24h           | 94,61 ± 7,18                             | 58,79 ± 7,31  | 53,61 ± 5,96           | 54,34 ± 7,00  | 1,13 ± 0,60            | 0,05 ± 0,09 |
| E 15 pg/mL / 24h           | 99,13 ± 0,15                             | 56,56 ± 5,54  | 70,45 ± 9,31           | 52,41 ± 7,66  | 0,74 ± 0,44            | 0,30 ± 0,04 |
| E 100 pg/mL / 48h          | 99,94 ± 0,10                             | 46,16 ± 6,48  | 69,41 ± 12,13          | 65,80 ± 5,92  | 0,03 ± 0,06            | 0,00 ± 0,00 |
| E 30 pg/mL / 48h           | 92,00 ± 5,27                             | 16,84 ± 0,33  | 49,05 ± 7,97           | 24,16 ± 4,49  | 0,30 ± 0,29            | 0,14 ± 0,03 |
| E 15 pg/mL / 48h           | 98,52 ± 1,92                             | 45,69 ± 1,52  | 74,36 ± 12,74          | 60,16 ± 4,17  | 0,29 ± 0,25            | 0,38 ± 0,17 |
| P 30 ng/mL / 24h           | 96,97 ± 3,77                             | 73,86 ± 13,76 | 55,50 ± 4,77           | 59,93 ± 6,15  | 0,56 ± 0,20            | 0,53 ± 0,09 |
| P 15 ng/mL / 24h           | 73,52 ± 9,86                             | 60,17 ± 6,83  | 63,40 ± 3,37           | 34,20 ± 4,79  | 0,33 ± 0,29            | 0,12 ± 0,12 |
| P 3 ng/mL / 24h            | 95,80 ± 3,48                             | 99,70 ± 0,24  | 69,48 ± 8,47           | 70,58 ± 5,87  | 0,95 ± 0,19            | 0,29 ± 0,25 |
| P 30 ng/mL / 48h           | 81,91 ± 9,69                             | 69,94 ± 4,21  | 59,63 ± 6,13           | 56,26 ± 1,03  | 0,90 ± 0,38            | 0,50 ± 0,13 |
| P 15 ng/mL / 48h           | 59,00 ± 9,66                             | 16,57 ± 1,90  | 72,97 ± 2,09           | 61,91 ± 1,95  | 0,50 ± 0,62            | 0,05 ± 0,09 |
| P 3 ng/mL / 48h            | 99,70 ± 0,24                             | 31,33 ± 2,27  | 72,77 ± 4,86           | 56,71 ± 5,72  | 0,29 ± 0,25            | 0,44 ± 0,26 |

Tab.1. supplementary file - Detailed scoring results for expression of estrogen and progesterone receptors and proliferative activity in glandular epithelial cells (GECs) and stromal cells (SCs) during different culturing media (standard and hormone free medium as well as supplemented estrogen E and progesterone P in different dosages for 24 and 48 hours, respectively); all values are listed as percentage values ±SD.
